# Supplementary material for: Post-COVID-19 condition: systemic inflammation and low functional exercise capacity
Source: PubMed Central journal article supplement (PMC10973152; doi:10.3389/fnut.2024.1295026), 2024-03-14
Supplement: Data_Sheet_1.pdf [file Data_Sheet_1.pdf]

## *Supplementary Material*

### **1 Methods**

Acute COVID-19 during hospitalisation was confirmed by RT-PCR performed with the equipment Abbott m200RT (Abbott Laboratories, Chicago, Illinois, USA) at the Central Laboratory Division of Hospital das Clínicas, São Paulo, Brazil. For highly suspect cases with at least 2 RT-PCR negative tests, serum antibodies were measured by chemiluminescent immunoassays on Liaison XL analyser (DiaSorin S.p.A., Saluggia, Italy) performed after seven days of the onset of symptoms or in subjects with high clinical suspicion for whom a RT-PCR test was not available up to the 10<sup>th</sup> day of symptom beginning.

#### 1.1 Statistical Analysis

##### 1.1.1 Cytokine Detection Limit

Readings from the cytokine panel reported a fraction of levels below detection threshold between 0% and 100% (median of 46%), characterizing a left-censored distribution for most cytokines. For observations with censored values, a value equal to the mean detection limit value for that cytokine divided by the square root of 2 was assigned.

##### 1.1.2 Batch Effect, Systemic Bias, and Variable Reduction

All numerical data were corrected for systematic bias, including variation in the time interval, in days, between hospital discharge and follow-up assessment. The cytokine panel was divided into 5 batches, with batches 1 to 3 carrying out similar number of samples for each group and batches 4 and 5 presenting fewer SRPF samples. The nonparametric version of the ComBat method (1) was used to correct for batch effects. After that, all tested variables were corrected for interval to follow-up by fitting a linear regression model.

As we had many variables to test hypotheses over, exclusion or combination of redundant or highly correlated variables was performed, as to increase the statistical power of the analysis. In particular, the cytokines IL-1 $\alpha$ , IL-5, IL-6 and IL-13 were excluded in favour of IL-4 and TNF- $\beta$ , which showed higher detection levels and were all positively correlated. Similarly, IL-1RA, IL-12p40 and IL-15 were excluded in favour of IL-7, IFN- $\alpha$ 2, IFN- $\gamma$ , G-CSF and VEGF, all with high positive correlations.

For blood laboratorial tests, leukocytes count was excluded in favour of lymphocytes count, haematocrit in favour of haemoglobin concentration, and serum iron in favour of ferritin serum content. For the function tests, systolic and diastolic blood pressures were combined within a mean blood pressure variable, while the highest measurement of both arms was chosen to represent the handgrip test result.

## 2 Results

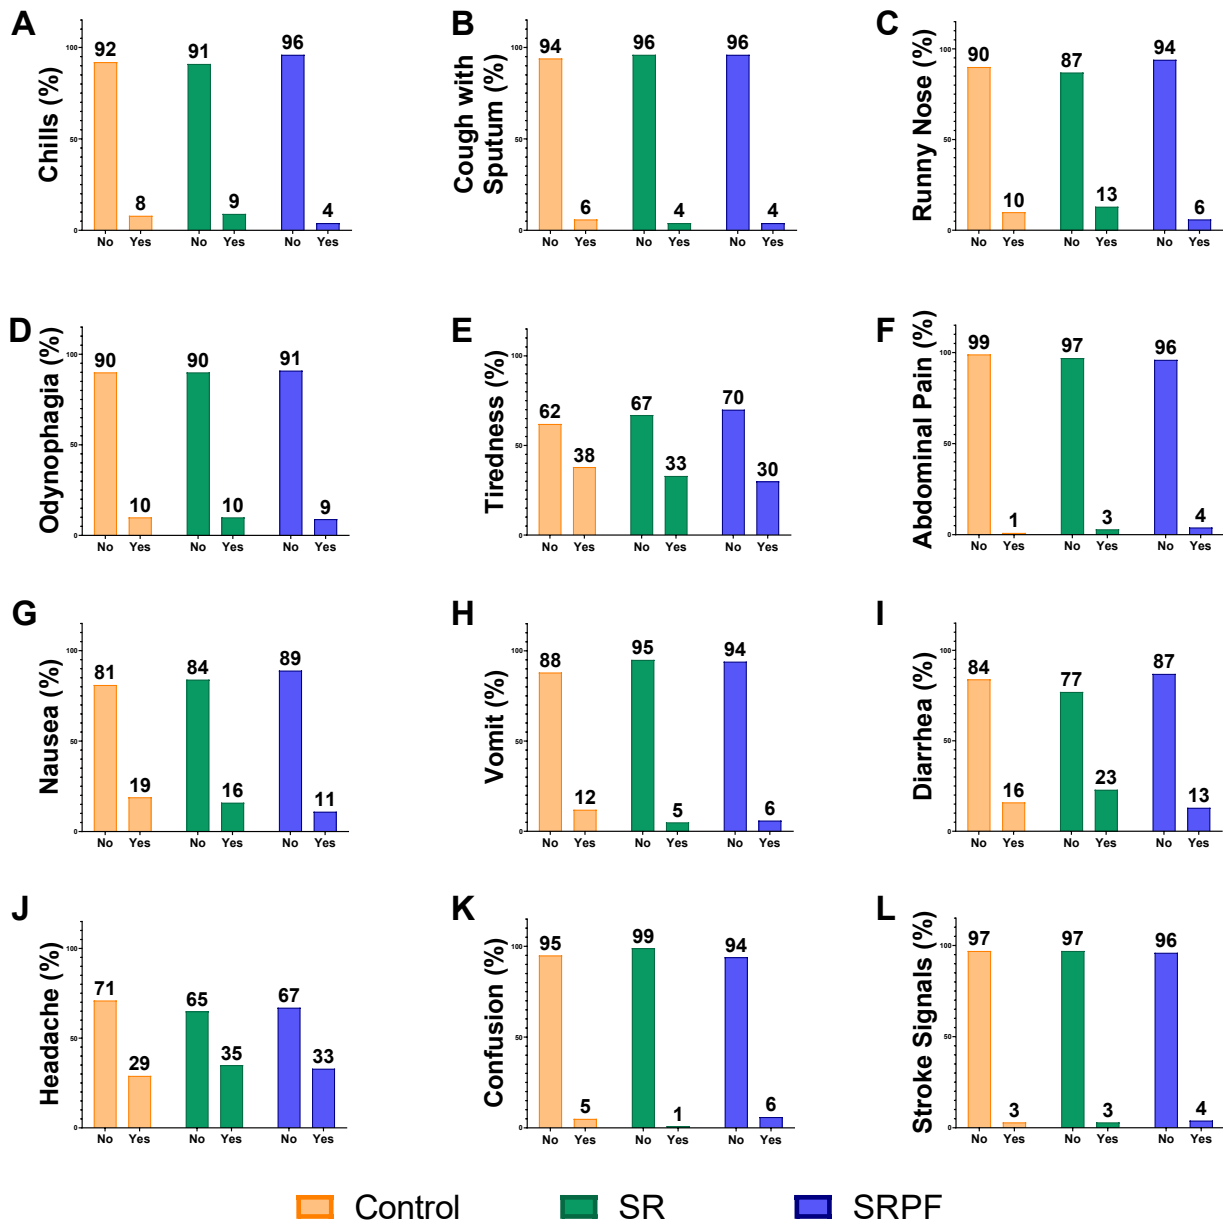

Supplementary Figure 1. Signs and symptoms at hospital admission. Data are presented as the percentage of patients in the group. A. Chills; B. Cough with Sputum; C. Runny Nose; D. Odynophagia; E. Tiredness; F. Abdominal Pain; G. Nausea; H. Vomit; I. Diarrhoea; J. Headache; K. Confusion; L. Stroke Signals. Chi-square test was used to compare frequencies. SR – self-reported symptoms group; SRPF – self-reported symptoms and decreased pulmonary function group.

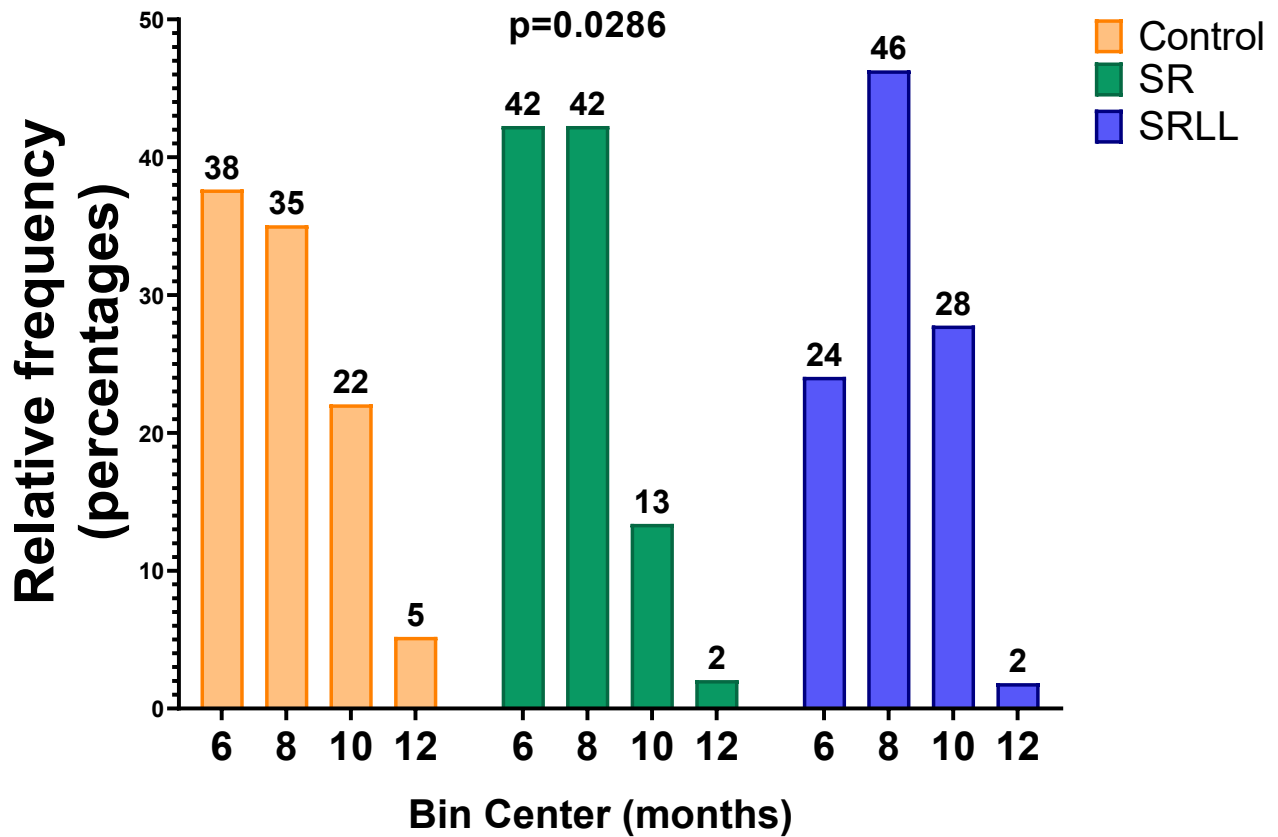

Supplementary Figure 2. Distribution of months to follow-up assessment. Chi-square test was used to compare frequencies. SR – self-reported symptoms group; SRPF – self-reported symptoms and decreased pulmonary function group.

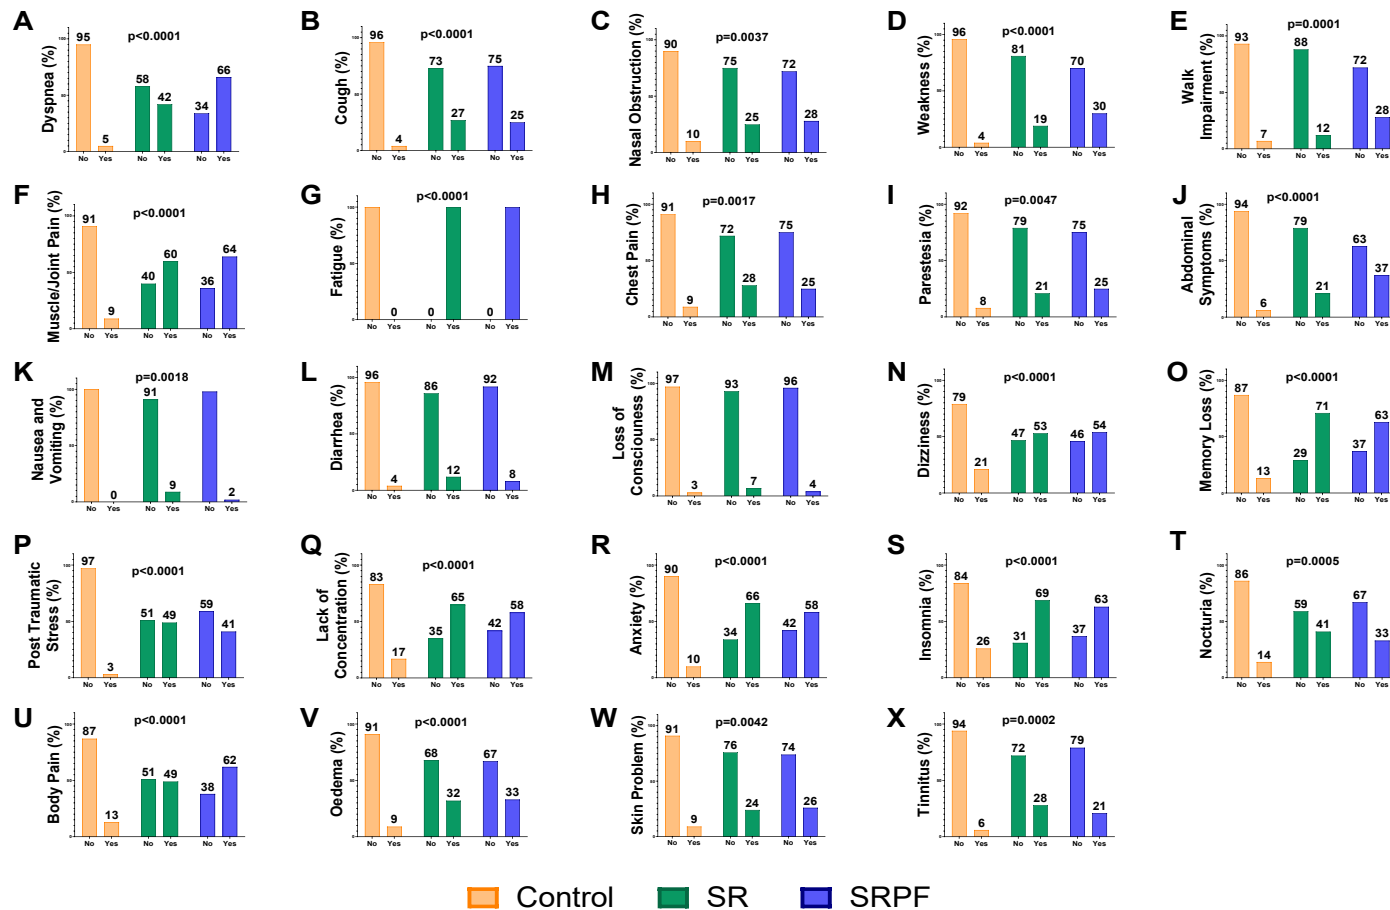

Supplementary Figure 3. Signs and symptoms in the follow-up assessment. Data are presented as the percentage of patients in the group. A. Dyspnea; B. Cough; C. Nasal Obstruction; D. Weakness; E. Walk Impairment; F. Muscle/Joint Pain; G. Fatigue; H. Chest Pain; I. Paresthesia; J. Abdominal Symptoms; K. Nausea and Vomiting; L. Diarrhoea; M. Loss of Consciousness; N. Dizziness; O. Memory Loss; P. Post-traumatic Stress; Q. Lack of Concentration; R. Anxiety; S. Insomnia; T. Nocturia; U. Body Pain; V. Oedema; W. Skin Problem. X. Tinnitus. SR – self-reported symptoms group; SRPF – self-reported symptoms and decreased pulmonary function group.

Supplementary Table 1. Parameters evaluated in the follow-up.

| Variable                         | Control                 | SR                      | SRPF                              | <i>q</i> -value   | Adjusted <i>p</i> -value | All <i>p</i> -values  |
|----------------------------------|-------------------------|-------------------------|-----------------------------------|-------------------|--------------------------|-----------------------|
| CRP (mg/dL)                      | 3.96 [1.40; 6.98]       | 5.77 [2.82; 10.45]*     | 6.08 [3.70; 10.33]*               | 0.0100;<br>0.0074 | 0.0692; 0.0422           | <0.01; <0.01;<br>0.55 |
| D-dimer (mg/L)                   | 410.02 [257.51; 580.05] | 418.01 [228.75; 733.17] | 463.00 [314.00; 720.00]           | n.s.              | n.s.                     | n.s.                  |
| Ferritin (µg/L)                  | 182.66 [106.88; 357.69] | 131.99 [51.71; 279.07]  | 115.61 [62.89; 262.45]            | n.s.              | n.s.                     | n.s.                  |
| Glycated haemoglobin (mmol/mol)  | 5.57 [5.20; 5.80]       | 5.77 [5.19; 6.28]       | 6.24 [5.65; 8.12]*, †             | 0.0003;<br>0.0074 | 0.0003; 0.0338           | 0.12; <0.01;<br><0.01 |
| Haemoglobin (g/dL)               | 14.33 [12.89; 15.42]    | 13.27 [12.08; 14.41]*   | 13.02 [11.93; 14.27]*             | 0.0100;<br>0.0070 | 0.0692; 0.0253           | <0.01; <0.01;<br>0.43 |
| Leucocytes                       | 6.46 [5.26; 7.73]       | 7.08 [6.01; 8.52]*      | 8.42 [6.20; 9.51]*                | 0.0485;<br>0.0013 | 0.3877; 0.0035           | 0.02; <0.01;<br>0.05  |
| MCV (fL)                         | 86.77 [83.33; 88.69]    | 85.36 [81.11; 88.73]    | 86.22 [83.02; 89.47]              | n.s.              | n.s.                     | n.s.                  |
| Platelets (×10 <sup>3</sup> /µL) | 242.35 [197.78; 286.95] | 259.10 [213.04; 303.55] | 264.00 [219.35; 316.08]           | n.s.              | n.s.                     | n.s.                  |
| BDNF (pg/mL)                     | 75.42 [51.14; 130.42]   | 67.28 [48.96; 100.08]   | 82.66 [58.48; 111.21]             | n.s.              | n.s.                     | n.s.                  |
| CCL11                            | 15.07 [8.26; 30.30]     | 9.46 [3.46; 17.54]*     | 17.43 [11.64; 35.28] <sup>†</sup> | 0.0117;<br>0.0009 | 0.0816; 0.0017           | <0.01; 0.18;<br><0.01 |
| EGF                              | 56.50 [32.80; 75.16]    | 46.37 [22.91; 87.78]    | 52.39 [25.79; 101.69]             | n.s.              | n.s.                     | n.s.                  |
| G-CSF                            | 6.55 [2.54; 13.69]      | 3.29 [2.56; 8.53]       | 2.84 [2.36; 7.24]*                | 0.0141            | 0.1033                   | 0.18; <0.01;<br>0.09  |
| IFN-α2                           | 6.45 [2.01; 10.82]      | 2.85 [2.02; 9.41]       | 2.05 [1.52; 8.91]*                | 0.0074            | 0.0422                   | 0.19; <0.01;<br>0.04  |
| IFN-γ                            | 3.87 [2.51; 7.41]       | 2.74 [2.60; 7.11]       | 3.34 [2.57; 5.70]                 | n.s.              | n.s.                     | n.s.                  |
| IL-10                            | 1.99 [1.83; 2.27]       | 1.98 [1.80; 2.10]       | 1.87 [1.76; 2.13]                 | n.s.              | n.s.                     | n.s.                  |
| IL-17                            | 1.88 [1.51; 1.97]       | 1.87 [1.54; 1.96]       | 1.58 [1.25; 1.95]                 | n.s.              | n.s.                     | n.s.                  |
| IL-4                             | 8.05 [2.95; 74.14]      | 6.29 [2.89; 46.36]      | 3.83 [2.38; 16.72]*, †            | 0.0185;<br>0.0303 | 0.1405; 0.2402           | 0.70; <0.01;<br>0.01  |
| IL-7                             | 6.77 [4.87; 10.89]      | 5.96 [3.31; 9.15]       | 5.59 [3.34; 8.12]                 | n.s.              | n.s.                     | n.s.                  |
| IL-8                             | 20.40 [8.74; 41.40]     | 21.70 [9.76; 52.00]     | 24.22 [8.38; 57.03]               | n.s.              | n.s.                     | n.s.                  |
| IP-10                            | 153.24 [123.24; 203.10] | 152.14 [117.02; 245.58] | 178.20 [140.44; 228.39]           | n.s.              | n.s.                     | n.s.                  |

|                |                         |                          |                                      |                   |                |                  |
|----------------|-------------------------|--------------------------|--------------------------------------|-------------------|----------------|------------------|
| MCP-1          | 368.76 [251.10; 534.95] | 328.24 [196.12; 426.74]* | 363.00 [272.61; 509.90] <sup>†</sup> | 0.0518;<br>0.0518 | 0.4254; 0.4254 | 0.03; 0.82; 0.03 |
| MIP-1 $\alpha$ | 4.28 [2.26; 6.97]       | 4.31 [2.41; 7.41]        | 3.82 [2.24; 10.71]                   | n.s.              | n.s.           | n.s.             |
| MIP-1 $\beta$  | 11.08 [6.65; 16.69]     | 10.68 [6.73; 15.60]      | 14.55 [8.23; 21.96] <sup>†</sup>     | 0.0290            | 0.2262         | 0.76; 0.03; 0.01 |
| TNF- $\alpha$  | 1.58 [1.51; 2.35]       | 1.63 [1.53; 1.85]        | 1.81 [1.58; 2.72]                    | n.s.              | n.s.           | n.s.             |
| TNF- $\beta$   | 1.73 [1.55; 5.79]       | 1.69 [1.61; 6.92]        | 1.68 [1.39; 5.52]                    | n.s.              | n.s.           | n.s.             |
| VEGF           | 28.07 [15.82; 56.47]    | 26.96 [14.69; 57.77]     | 26.75 [11.98; 55.92]                 | n.s.              | n.s.           | n.s.             |

Comparisons were performed using the Kruskal-Wallis test followed by Dunn's post hoc test after adjustment by days to follow-up assessment. Statistical significance was considered when  $q < 0.052$  in the Dunn's post-hoc test. n.s. non-significant in Kruskal-Wallis test, post-hoc test not performed. BDNF brain-derived neurotrophic factor; BMI body mass index, CCL11 C-C motif chemokine ligand 11 (eotaxin-1); CRP C-reactive protein; EGF endothelial growth factor; G-CSF granulocyte colony-stimulating factor; IFN interferon; IL interleukin MCP1 monocyte chemoattractant protein 1; MCV mean corpuscular volume; MIP macrophage inflammatory protein; TNF tumor necrosis factor; VEGF vascular endothelial growth factor.

Supplementary Table 2. Sex stratification after interval correction for the parameters included in this study.

| Variable                                     | Sex   | Control                 | SR                      | SRPF                    | <i>q</i> -value   | Adjusted <i>p</i> -value | All <i>p</i> -values |
|----------------------------------------------|-------|-------------------------|-------------------------|-------------------------|-------------------|--------------------------|----------------------|
| Haemoglobin (g/dL)                           | Women | 12.72 [12.12; 13.66]    | 13.09 [11.98; 14.09]    | 12.40 [11.54; 13.65]    | n.s.              | n.s.                     | n.s.                 |
| Haemoglobin (g/dL)                           | Men   | 15.00 [14.11; 15.82]    | 14.29 [12.74; 15.66]    | 13.80 [12.75; 14.62]*   | 0.0089            | 0.0526                   | 0.08;<br><0.01; 0.23 |
| MCV (fL)                                     | Women | 87.21 [82.79; 88.71]    | 84.71 [80.96; 87.81]    | 84.10 [82.57; 89.02]    | n.s.              | n.s.                     | n.s.                 |
| MCV (fL)                                     | Men   | 86.56 [83.45; 88.58]    | 86.49 [84.09; 89.52]    | 87.57 [85.58; 89.91]    | n.s.              | n.s.                     | n.s.                 |
| Leucocytes                                   | Women | 6.30 [4.96; 7.73]       | 7.32 [6.15; 8.77]*      | 8.87 [6.31; 10.82]*     | 0.0549;<br>0.0018 | 0.3837;<br>0.0063        | 0.02;<br><0.01; 0.05 |
| Leucocytes                                   | Men   | 6.56 [5.43; 7.72]       | 6.87 [5.79; 8.35]       | 8.03 [6.01; 8.83]       | n.s.              | n.s.                     | n.s.                 |
| Platelets (×10 <sup>3</sup> /μL)             | Women | 287.73 [227.40; 305.78] | 270.73 [243.53; 317.41] | 310.19 [255.81; 346.52] | n.s.              | n.s.                     | n.s.                 |
| Platelets (×10 <sup>3</sup> /μL)             | Men   | 232.36 [190.20; 259.19] | 219.05 [201.06; 279.66] | 224.03 [188.81; 263.03] | n.s.              | n.s.                     | n.s.                 |
| CRP (mg/dL)                                  | Women | 6.29 [2.96; 8.84]       | 5.88 [3.58; 10.05]      | 7.54 [4.88; 13.43]      | n.s.              | n.s.                     | n.s.                 |
| CRP (mg/dL)                                  | Men   | 2.81 [1.09; 5.69]       | 5.42 [1.76; 10.45]      | 5.19 [3.49; 8.18]       | n.s.              | n.s.                     | n.s.                 |
| D-dimer (mg/L)                               | Women | 410.02 [273.99; 580.05] | 429.50 [237.63; 733.17] | 432.97 [334.74; 732.24] | n.s.              | n.s.                     | n.s.                 |
| D-dimer (mg/L)                               | Men   | 412.51 [233.62; 580.67] | 303.77 [187.24; 679.27] | 507.53 [310.26; 691.04] | n.s.              | n.s.                     | n.s.                 |
| Glycated haemoglobin (mmol/mol) <sup>3</sup> | Women | 5.48 [5.25; 5.91]       | 5.84 [5.38; 6.20]       | 6.12 [5.50; 8.33]       | n.s.              | n.s.                     | n.s.                 |
| Glycated haemoglobin (mmol/mol) <sup>3</sup> | Men   | 5.59 [5.32; 5.92]       | 5.77 [5.19; 6.94]       | 6.54 [5.47; 7.58]       | n.s.              | n.s.                     | n.s.                 |
| Ferritin (μg/L)                              | Women | 106.88 [53.48; 182.66]  | 104.16 [46.82; 183.95]  | 102.88 [51.71; 182.54]  | n.s.              | n.s.                     | n.s.                 |
| Ferritin (μg/L)                              | Men   | 281.66 [163.54; 443.32] | 283.88 [116.22; 521.32] | 261.23 [97.37; 360.76]  | n.s.              | n.s.                     | n.s.                 |
| BDNF                                         | Women | 90 [67; 133]            | 67 [49; 100]*           | 87 [61; 114]            | 0.0549            | 0.3837                   | 0.02; 0.80;<br>0.04  |
| BDNF                                         | Men   | 63 [45; 120]            | 66 [48; 91]             | 80 [55; 104]            | n.s.              | n.s.                     | n.s.                 |
| EGF                                          | Women | 67.41 [54.12; 74.34]    | 45.74 [22.91; 85.70]    | 51.30 [30.29; 101.53]   | n.s.              | n.s.                     | n.s.                 |
| EGF                                          | Men   | 42.73 [29.03; 75.92]    | 49.74 [23.42; 90.71]    | 53.47 [13.94; 99.06]    | n.s.              | n.s.                     | n.s.                 |
| CCL11                                        | Women | 13.94 [5.80; 29.74]     | 6.78 [3.41; 14.24]*     | 16.14 [11.38; 29.03]†   | 0.0549;<br>0.0018 | 0.3837;<br>0.0060        | 0.02; 0.26;<br><0.01 |
| CCL11                                        | Men   | 15.77 [8.69; 32.42]     | 15.29 [6.17; 26.25]     | 24.74 [12.07; 38.10]    | n.s.              | n.s.                     | n.s.                 |

|                 |       |                         |                         |                         |      |      |      |
|-----------------|-------|-------------------------|-------------------------|-------------------------|------|------|------|
| G-CSF           | Women | 5.92 [2.46; 12.29]      | 3.35 [2.64; 8.27]       | 2.82 [2.39; 6.69]       | n.s. | n.s. | n.s. |
| G-CSF           | Men   | 7.18 [2.55; 15.57]      | 3.21 [2.55; 14.35]      | 3.04 [2.30; 7.31]       | n.s. | n.s. | n.s. |
| IFN- $\alpha$ 2 | Women | 2.62 [1.94; 8.75]       | 2.95 [2.06; 7.71]       | 1.99 [1.44; 6.66]       | n.s. | n.s. | n.s. |
| IFN- $\alpha$ 2 | Men   | 7.99 [2.20; 11.52]      | 2.59 [1.93; 10.52]      | 2.08 [1.86; 9.97]       | n.s. | n.s. | n.s. |
| IFN- $\gamma$   | Women | 2.68 [2.50; 6.35]       | 2.68 [2.60; 6.14]       | 2.64 [2.56; 5.66]       | n.s. | n.s. | n.s. |
| IFN- $\gamma$   | Men   | 3.90 [2.58; 7.47]       | 4.16 [2.61; 9.37]       | 3.97 [2.59; 6.27]       | n.s. | n.s. | n.s. |
| IL-4            | Women | 6.18 [3.12; 103.23]     | 7.81 [3.24; 46.36]      | 4.07 [2.29; 20.62]      | n.s. | n.s. | n.s. |
| IL-4            | Men   | 8.17 [2.90; 40.62]      | 4.87 [2.75; 37.13]      | 3.67 [2.51; 6.64]       | n.s. | n.s. | n.s. |
| IL-7            | Women | 6.83 [5.17; 12.28]      | 5.73 [3.33; 7.96]       | 5.57 [3.34; 9.60]       | n.s. | n.s. | n.s. |
| IL-7            | Men   | 6.60 [4.59; 9.81]       | 6.67 [2.61; 11.44]      | 5.59 [3.30; 7.49]       | n.s. | n.s. | n.s. |
| IL-8            | Women | 18.89 [9.65; 31.33]     | 24.39 [12.48; 48.99]    | 21.78 [8.77; 52.34]     | n.s. | n.s. | n.s. |
| IL-8            | Men   | 20.44 [8.66; 52.90]     | 14.17 [5.90; 56.93]     | 32.01 [10.21; 58.50]    | n.s. | n.s. | n.s. |
| IL-10           | Women | 1.96 [1.73; 2.23]       | 2.00 [1.78; 2.11]       | 1.87 [1.76; 2.09]       | n.s. | n.s. | n.s. |
| IL-10           | Men   | 2.01 [1.85; 2.43]       | 1.96 [1.81; 2.06]       | 1.83 [1.76; 2.21]       | n.s. | n.s. | n.s. |
| IL-17           | Women | 1.89 [1.51; 1.97]       | 1.89 [1.77; 1.97]       | 1.57 [1.24; 1.94]       | n.s. | n.s. | n.s. |
| IL-17           | Men   | 1.87 [1.51; 1.99]       | 1.56 [1.22; 1.91]       | 1.59 [1.34; 1.93]       | n.s. | n.s. | n.s. |
| IP-10           | Women | 156.32 [126.62; 249.15] | 150.20 [118.11; 245.58] | 175.57 [140.83; 238.93] | n.s. | n.s. | n.s. |
| IP-10           | Men   | 148.22 [114.16; 194.88] | 179.38 [116.44; 251.87] | 180.83 [141.05; 218.66] | n.s. | n.s. | n.s. |
| MCP-1           | Women | 330.63 [189.72; 454.30] | 316.61 [193.08; 438.94] | 360.50 [267.63; 535.60] | n.s. | n.s. | n.s. |
| MCP-1           | Men   | 384.63 [253.10; 550.72] | 334.33 [215.36; 392.77] | 378.27 [284.44; 499.48] | n.s. | n.s. | n.s. |
| MIP-1 $\alpha$  | Women | 4.36 [2.11; 6.97]       | 4.38 [2.48; 8.51]       | 4.32 [2.24; 15.05]      | n.s. | n.s. | n.s. |
| MIP-1 $\alpha$  | Men   | 3.81 [2.35; 6.51]       | 3.00 [2.21; 6.30]       | 2.89 [2.25; 7.37]       | n.s. | n.s. | n.s. |
| MIP-1 $\beta$   | Women | 11.51 [8.77; 14.17]     | 10.25 [6.36; 14.72]     | 15.30 [8.85; 26.48]     | n.s. | n.s. | n.s. |
| MIP-1 $\beta$   | Men   | 9.91 [6.20; 18.22]      | 12.99 [6.97; 18.91]     | 13.06 [7.60; 18.55]     | n.s. | n.s. | n.s. |
| TNF- $\alpha$   | Women | 1.56 [1.50; 1.93]       | 1.61 [1.52; 1.77]       | 1.83 [1.58; 2.51]       | n.s. | n.s. | n.s. |
| TNF- $\alpha$   | Men   | 1.60 [1.52; 2.44]       | 1.80 [1.58; 2.35]       | 1.80 [1.60; 2.83]       | n.s. | n.s. | n.s. |
| TNF- $\beta$    | Women | 1.76 [1.54; 7.20]       | 1.68 [1.62; 6.92]       | 1.68 [1.39; 13.39]      | n.s. | n.s. | n.s. |
| TNF- $\beta$    | Men   | 1.73 [1.57; 5.42]       | 1.69 [1.40; 8.93]       | 1.67 [1.41; 2.18]       | n.s. | n.s. | n.s. |
| VEGF            | Women | 30.44 [15.45; 59.15]    | 26.00 [14.69; 53.99]    | 22.53 [9.43; 57.97]     | n.s. | n.s. | n.s. |
| VEGF            | Men   | 26.46 [16.63; 53.07]    | 27.41 [14.43; 59.11]    | 33.63 [17.22; 47.06]    | n.s. | n.s. | n.s. |



|                                                      |       |                       |                       |                                      |                   |                   |                      |
|------------------------------------------------------|-------|-----------------------|-----------------------|--------------------------------------|-------------------|-------------------|----------------------|
| Mean peripheral blood pressure, basal                | Women | 93.29 [89.64; 100.11] | 94.93 [88.70; 104.95] | 91.64 [83.97; 104.87]                | n.s.              | n.s.              | n.s.                 |
| Mean peripheral blood pressure, basal                | Men   | 91.77 [84.07; 99.41]  | 93.82 [84.02; 104.88] | 88.92 [85.53; 94.25]                 | n.s.              | n.s.              | n.s.                 |
| Heart rate, basal                                    | Women | 71.54 [68.08; 83.44]  | 79.51 [68.08; 84.17]  | 80.78 [69.32; 94.55]                 | n.s.              | n.s.              | n.s.                 |
| Heart rate, basal                                    | Men   | 67.98 [58.34; 78.47]  | 74.99 [63.99; 83.41]  | 70.15 [58.63; 80.43]                 | n.s.              | n.s.              | n.s.                 |
| respiratory rate, basal                              | Women | 19.06 [17.84; 20.07]  | 19.97 [18.03; 21.52]  | 19.96 [18.92; 21.28]                 | n.s.              | n.s.              | n.s.                 |
| Respiratory rate, basal                              | Men   | 19.10 [16.32; 20.09]  | 18.69 [17.82; 19.99]  | 19.94 [17.86; 20.54]                 | n.s.              | n.s.              | n.s.                 |
| Peripheral oxygen saturation, basal                  | Women | 97.07 [94.12; 97.88]  | 97.34 [96.68; 98.04]  | 96.89 [95.04; 97.19] <sup>†</sup>    | 0.0089            | 0.0487            | 0.10; 0.25;<br><0.01 |
| Peripheral oxygen saturation, basal                  | Men   | 97.29 [95.71; 98.02]  | 96.62 [94.72; 97.09]  | 97.01 [95.75; 97.70]                 | n.s.              | n.s.              | n.s.                 |
| Test repetitions                                     | Women | 18.91 [13.87; 23.33]  | 14.45 [12.01; 18.77]  | 13.60 [10.33; 16.27]                 | n.s.              | n.s.              | n.s.                 |
| Test repetitions                                     | Men   | 21.39 [18.51; 25.77]  | 19.03 [14.15; 24.44]  | 15.63 [12.16; 18.47] <sup>*, †</sup> | 0.0018;<br>0.0632 | 0.0018;<br>0.4568 | 0.14;<br><0.01; 0.03 |
| Borg Dyspnea Scale, pre-test value                   | Women | 0.28 [0.08; 1.95]     | 1.22 [0.07; 3.02]     | 1.21 [0.14; 3.03]                    | n.s.              | n.s.              | n.s.                 |
| Borg Dyspnea Scale, pre-test value                   | Men   | 0.06 [-0.03; 0.30]    | 0.10 [-0.01; 0.96]    | 1.98 [0.64; 2.92] <sup>*, †</sup>    | 0.0018;<br>0.0633 | 0.0062;<br>0.4592 | 0.18;<br><0.01; 0.03 |
| Borg Dyspnea Scale, post-test difference             | Women | 1.56 [0.48; 2.17]     | 1.95 [0.49; 3.00]     | 1.56 [0.98; 2.33]                    | n.s.              | n.s.              | n.s.                 |
| Borg Dyspnea Scale, post-test difference             | Men   | 1.99 [0.47; 2.97]     | 3.01 [1.00; 3.31]     | 1.97 [1.08; 2.10]                    | n.s.              | n.s.              | n.s.                 |
| Mean peripheral blood pressure, post-test difference | Women | 10.66 [1.97; 13.32]   | 2.67 [0.64; 5.96]     | 0.46 [-4.43; 2.08]                   | n.s.              | n.s.              | n.s.                 |
| Mean peripheral blood pressure, Post-test difference | Men   | -2.34 [-3.32; 1.36]   | 0.08 [-0.24; 5.71]    | 4.32 [1.51; 7.14]                    | n.s.              | n.s.              | n.s.                 |
| heart rate, post-test difference                     | Women | 18.76 [5.96; 32.74]   | 15.51 [5.56; 25.25]   | 14.76 [1.67; 19.38]                  | n.s.              | n.s.              | n.s.                 |

|                                                    |       |                      |                       |                                   |                   |                   |                      |
|----------------------------------------------------|-------|----------------------|-----------------------|-----------------------------------|-------------------|-------------------|----------------------|
| Heart rate, post-test difference                   | Men   | 22.08 [6.24; 30.28]  | 18.27 [9.01; 26.24]   | 9.18 [-12.62; 25.90]              | n.s.              | n.s.              | n.s.                 |
| Peripheral oxygen saturation, post-test difference | Women | 0.72 [0.01; 1.22]    | -0.00 [-0.92; 0.83]   | -0.05 [-0.99; 1.24]               | n.s.              | n.s.              | n.s.                 |
| Peripheral oxygen saturation, post-test difference | Men   | 0.42 [-0.11; 2.03]   | 0.01 [-1.01; 1.99]    | 0.07 [-0.89; 1.04]                | n.s.              | n.s.              | n.s.                 |
| Up-and-go test                                     | Women | 12.96 [10.69; 14.30] | 13.00 [11.24; 15.89]  | 13.04 [11.95; 16.29]              | n.s.              | n.s.              | n.s.                 |
| Up-and-go test                                     | Men   | 10.62 [9.53; 12.24]  | 12.40 [11.07; 14.02]* | 13.31 [12.30; 15.97]*             | 0.0591;<br>0.0027 | 0.4205;<br>0.0133 | 0.03;<br><0.01; 0.24 |
| Handgrip, left/right hands max                     | Women | 16.54 [8.50; 22.85]  | 10.09 [4.89; 18.37]   | 18.13 [15.77; 20.35] <sup>†</sup> | 0.0019            | 0.0082            | 0.04; 0.23;<br><0.01 |
| Handgrip, left/right hands max                     | Men   | 32.43 [27.22; 43.47] | 34.66 [24.69; 37.98]  | 27.83 [24.57; 31.05]              | n.s.              | n.s.              | n.s.                 |

Comparisons were performed using the Kruskal-Wallis test followed by Dunn's post hoc test after adjustment by days to follow-up assessment. Statistical significance was considered when  $q < 0.076$  in the Dunn's post-hoc test. <sup>‡</sup> Adjusted for age. n.s. non-significant in Kruskal-Wallis test, post-hoc test not performed. BDNF brain-derived neurotrophic factor; BMI body mass index, CCL11 C-C motif chemokine ligand 11 (eotaxin-1); CRP C-reactive protein; EGF endothelial growth factor; G-CSF granulocyte colony-stimulating factor; IFN interferon; IL interleukin MCP1 monocyte chemoattractant protein 1; MCV mean corpuscular volume; MIP macrophage inflammatory protein; TNF tumor necrosis factor; VEGF vascular endothelial growth factor.

Supplementary Table 3. Multiple linear regression to test the ability of serum cytokines in predicting the handgrip strength in women. The confounding factors age, sex, and follow-up interval were also included in the model.  $R^2 = 0.24$ ,  $F(2.19) = 3.73$ ,  $p=0.015$ .

| Cytokine        | $\beta$ | $p$ -value |
|-----------------|---------|------------|
| BDNF            | 6,69    | 0,052      |
| CCL11           | 4,10    | 0,060      |
| EGF             | 1,41    | 0,448      |
| IFN- $\alpha$ 2 | -0,59   | 0,802      |
| IL-4            | -1,14   | 0,293      |
| IL-8            | -3,14   | 0,104      |
| IL-10           | 10,41   | 0,100      |
| IL-17           | -4,67   | 0,453      |
| IP-10           | -0,28   | 0,949      |
| MCP-1           | 1,00    | 0,750      |
| MIP-1 $\alpha$  | -0,49   | 0,735      |
| MIP-1 $\beta$   | 2,56    | 0,355      |
| TNF- $\alpha$   | 11,87   | 0,039      |

BDNF – ng/dL, other cytokines – pg/dL.

### 3 References

1. Johnson WE, Li C, Rabinovic A. Adjusting batch effects in microarray expression data using empirical Bayes methods. *Biostatistics* [Internet]. 2007 Jan 1 [cited 2023 Mar 27];8(1):118–27. Available from: <https://academic.oup.com/biostatistics/article/8/1/118/252073>
